# Supplementary material for: Towards the Development and Verification of a 3D-Based Advanced Optimized Farm Machinery Trajectory Algorithm
Source: MDPI journal article supplement (doi:10.3390/s21092980), 2021-04-23
Supplement: s1 [file s1]

## Supplementary materials:

### 1. UML activity diagrams

Note an overall UML activity diagram documenting the developed algorithm is depicted in Figure 5. Supplementary Materials contain seven remaining UML diagrams to demonstrate a more detailed level of the developed algorithm

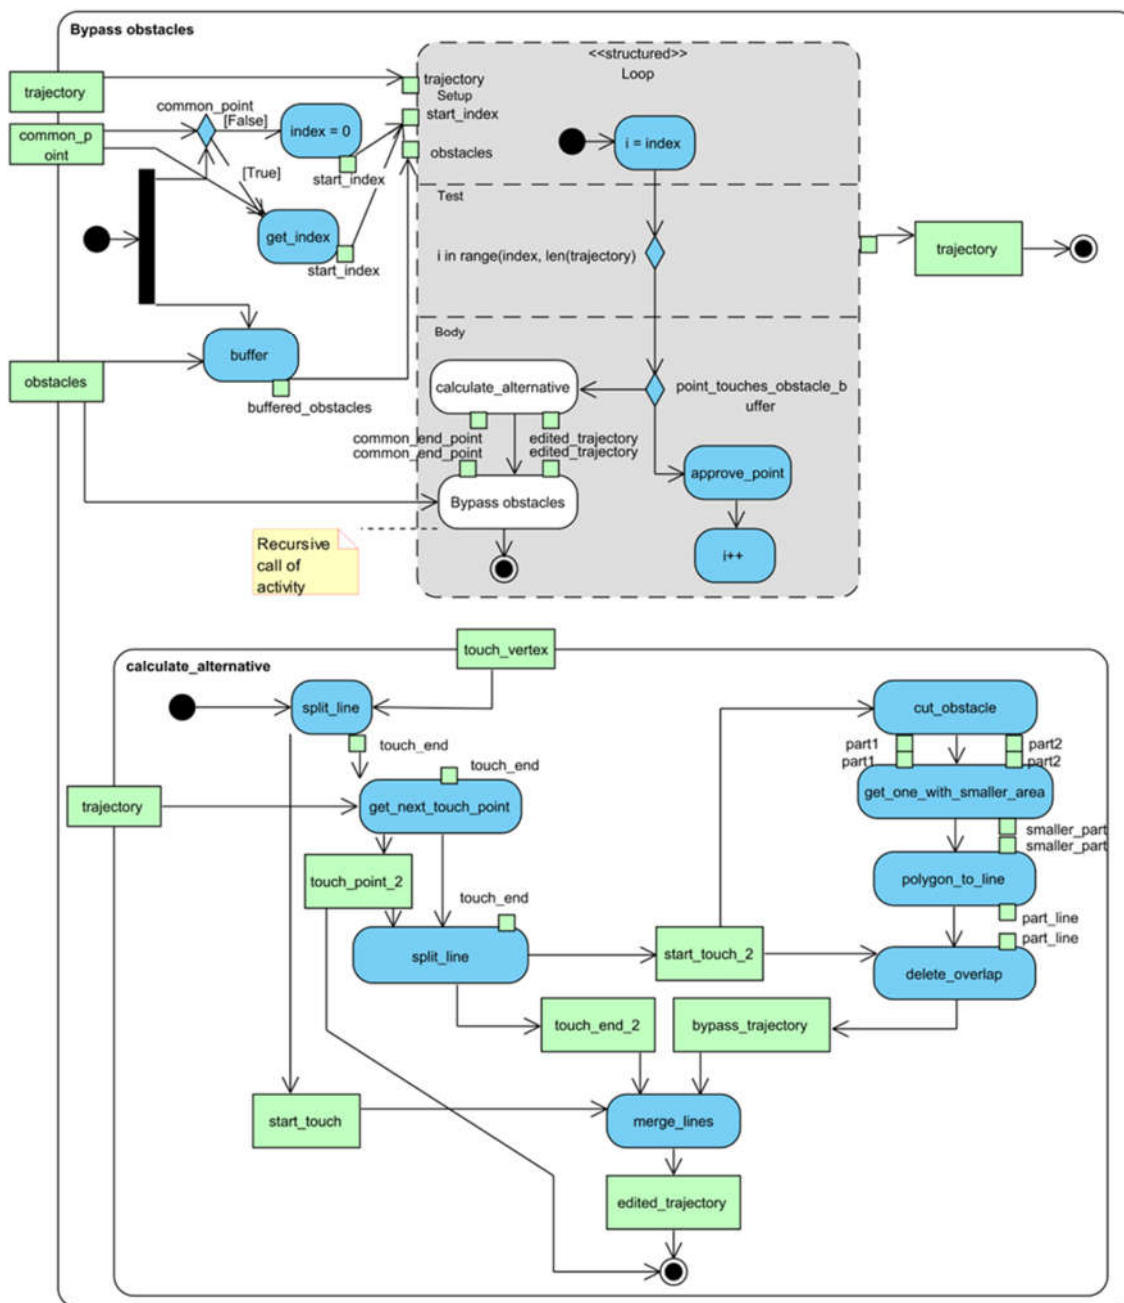

Figure S1. UML activity diagram for a 'Bypass the obstacles' module.

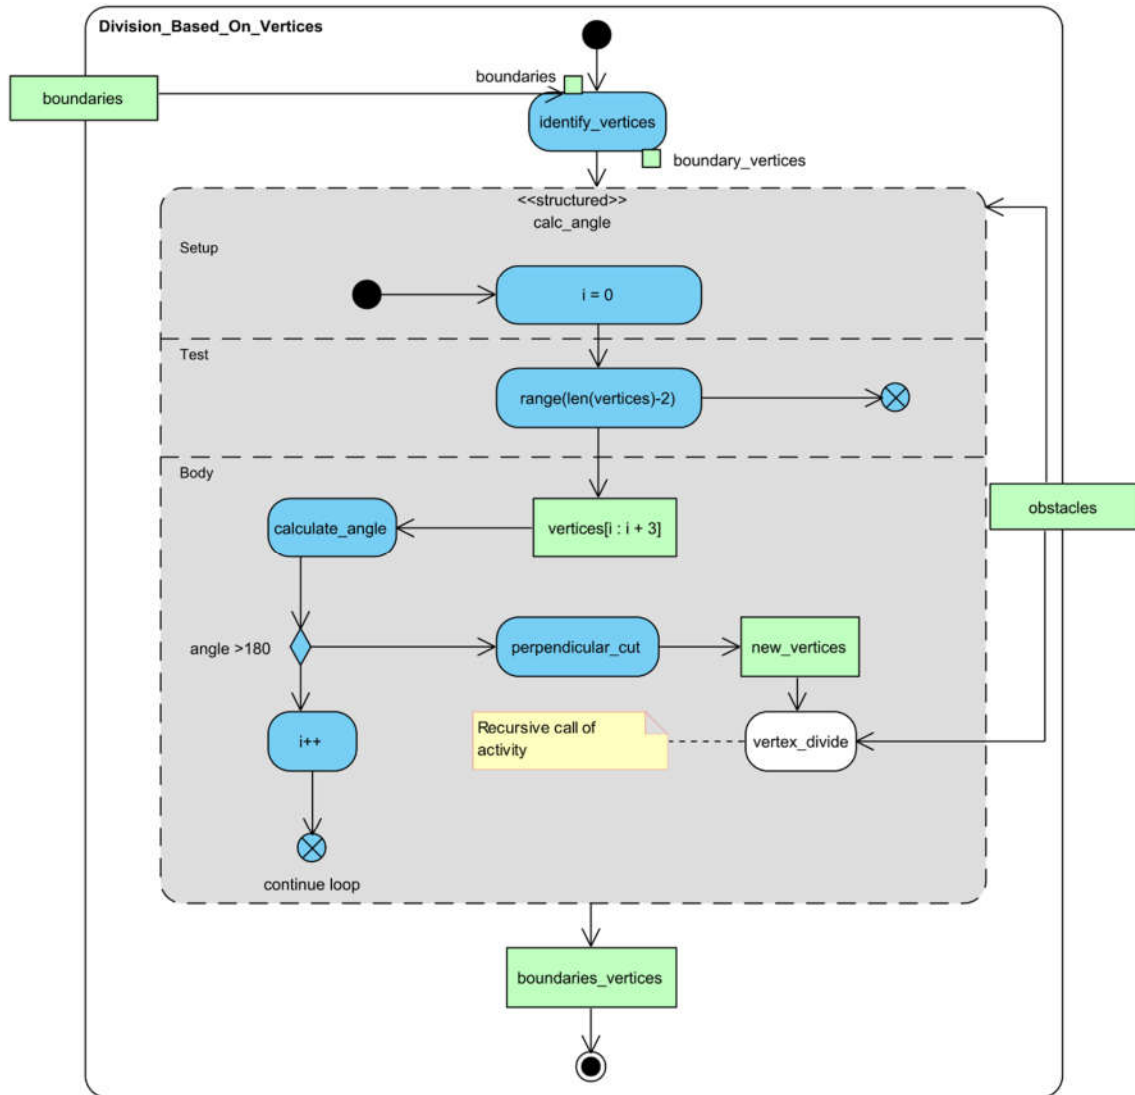

**Figure S2.** UML activity diagram for a 'Plot fragmentation module', 'Division\_Based\_On\_Vertices' function respectively.

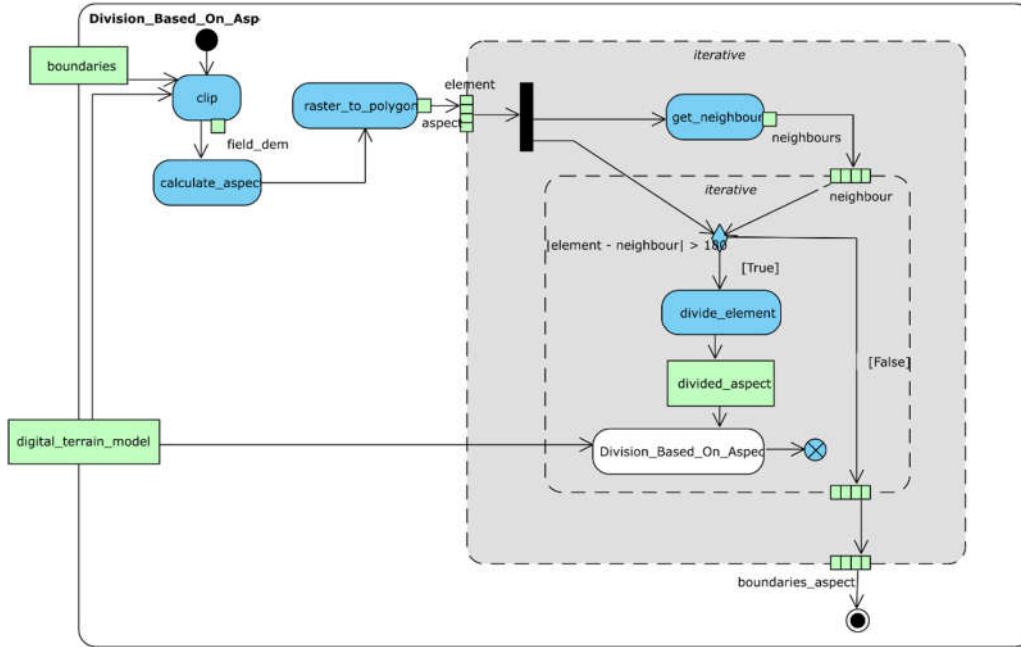

Figure S3. UML activity diagram for a 'Plot fragmentation module', 'Division\_Based\_On\_Asp' function respectively.

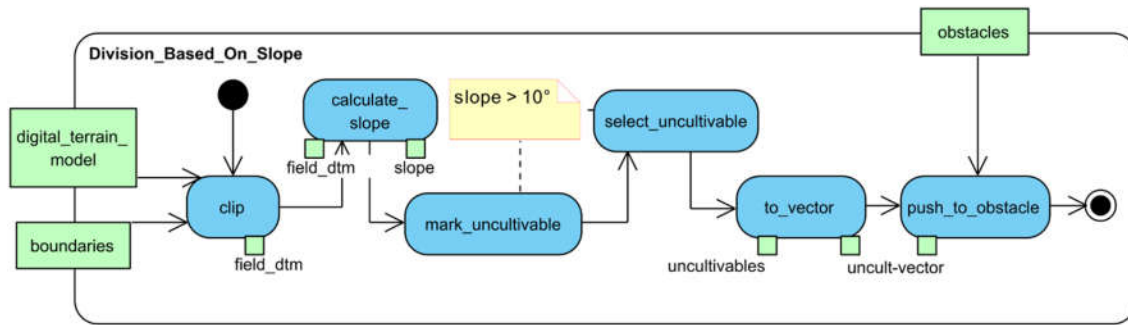

Figure S4. UML activity diagram for a 'Plot fragmentation module', 'Division\_Based\_On\_Slope' function respectively.

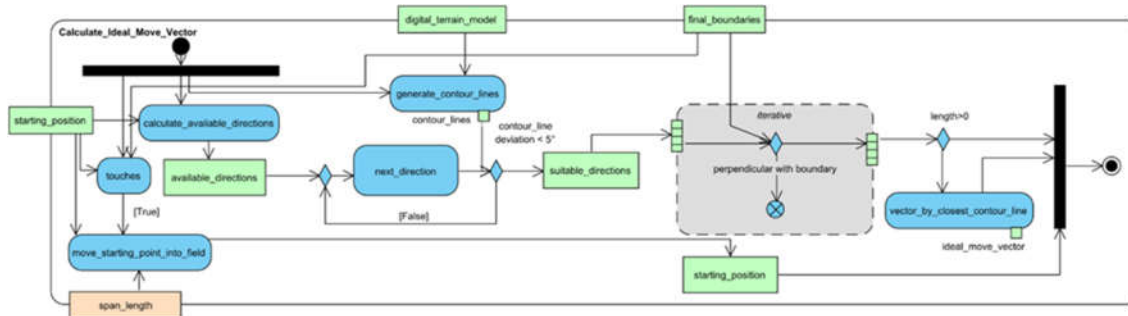

Figure S5. UML activity diagram for a 'Trajectory calculation' module, 'Initiation-submodule', 'Calculate\_Ideal\_Move\_Vector' function respectively.

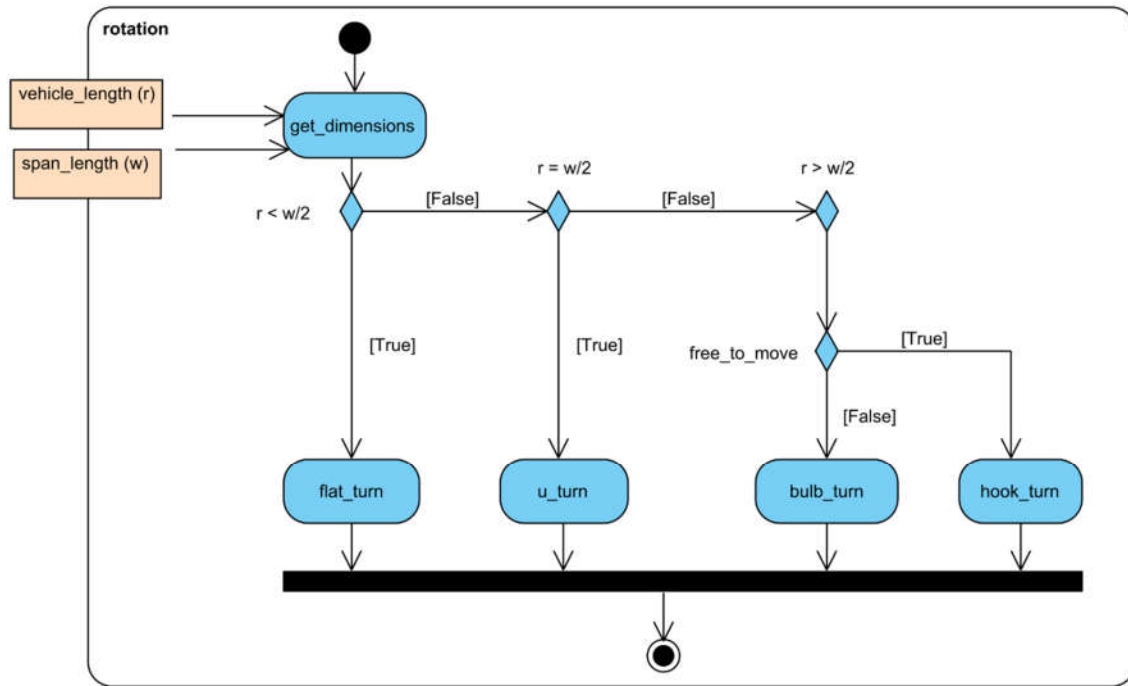

**Figure S6.** UML activity diagram for a 'Trajectory calculation' module, 'rotation' function respectively.

---

## 2. Complete Pseudocode

Algorithm for optimal planning trajectories

main *//function calls*

```
{  
    findData  
    boundary  
    obstacles  
    splitVertex  
    exposition  
    slopeDivide  
    rotation  
    findStart  
    checkTrajectory  
    calculateIdealMoveVector  
    bypassObstacles  
    end  
}
```

Vehicle length =  $r$

span lenght =  $w$

function findData *//put every data for calculation - elevation model, boundaries e.a.*

```
{  
    ask for DATA  
}
```

function boundary *//function for checking boundaries, find correct format*

```
{  
    detect geometry  
    if geometry is polygon  
    {  
        we have boundaries  
    }  
  
    else if geometry is polygon  
    {  
        calculate boundaries from DATA  
    }  
  
    else  
        ERROR  
}
```

function obstacles *//for example, if you have some organic obstacle that is active only during the growing season*

```
{  
    ask in attribute table on obstacle  
    if yes  
    {  
        create buffer and say this is error place  
    }  
}
```

---

```

function splitVertex // you could choose this function, real calculation is in 2D
{
    boundaries.vertex
    identify.vertex
    for i, i=0, i++
    {
        calculate angle between vertex i, i+1 and i+2
        if angle>180
        {
            perpendicular.cut
            create new boundaries
            splitVertex
        }
        else i++
    }
}

function exposition // you could choose this function, identifies natural changes in the landscape
{
    aspect.ELEVATIONMODEL
    compare angle in line z with neighbours
    if i>180
        split by boundary
}

function slopeDivide // identification obstacles from nature
{
    add ELEVATIONMODEL
    clip.ELEVATIONMODEL by boundaries
    for i, i=0, i++
    {
        calculate.slope = ELEVATIONMODEL
    }
    for i, i=0, i++
    {
        if slope >=10
            push to obstacles
    }
}

function rotation // definition of shape of rotation way by Jin and Tang 2010
{
    if r < w/2
        choose Flat turn
    elseif r = w/2
        choose U turn
    elseif r > w/2
        if one part is limited
            If TRUE
                choose hook turn
            elseif FALSE
                choose bulb turn
}

```

[illegible]

---

```
    if every single piece of place are full
    STOP
    regressToEntry
}

function regressToEntry           // go home function
{
    find closest boundary
    find closest vertex on boundary of whole field
    for i=closest vertex, i>=0, i--
    {
        calculate length from closest vertex on boundary to START
        return firstWay
    }
    for i=closest vertex, i<=last vertex, i++
    {
        calculate length from closest vertex on boundary to START
        return secondWay
    }
    if firstWay>secondWay
    {
        choose secondWay
    }
    else choose firstWay
}
```



### 3. All options of optimized trajectories in maps

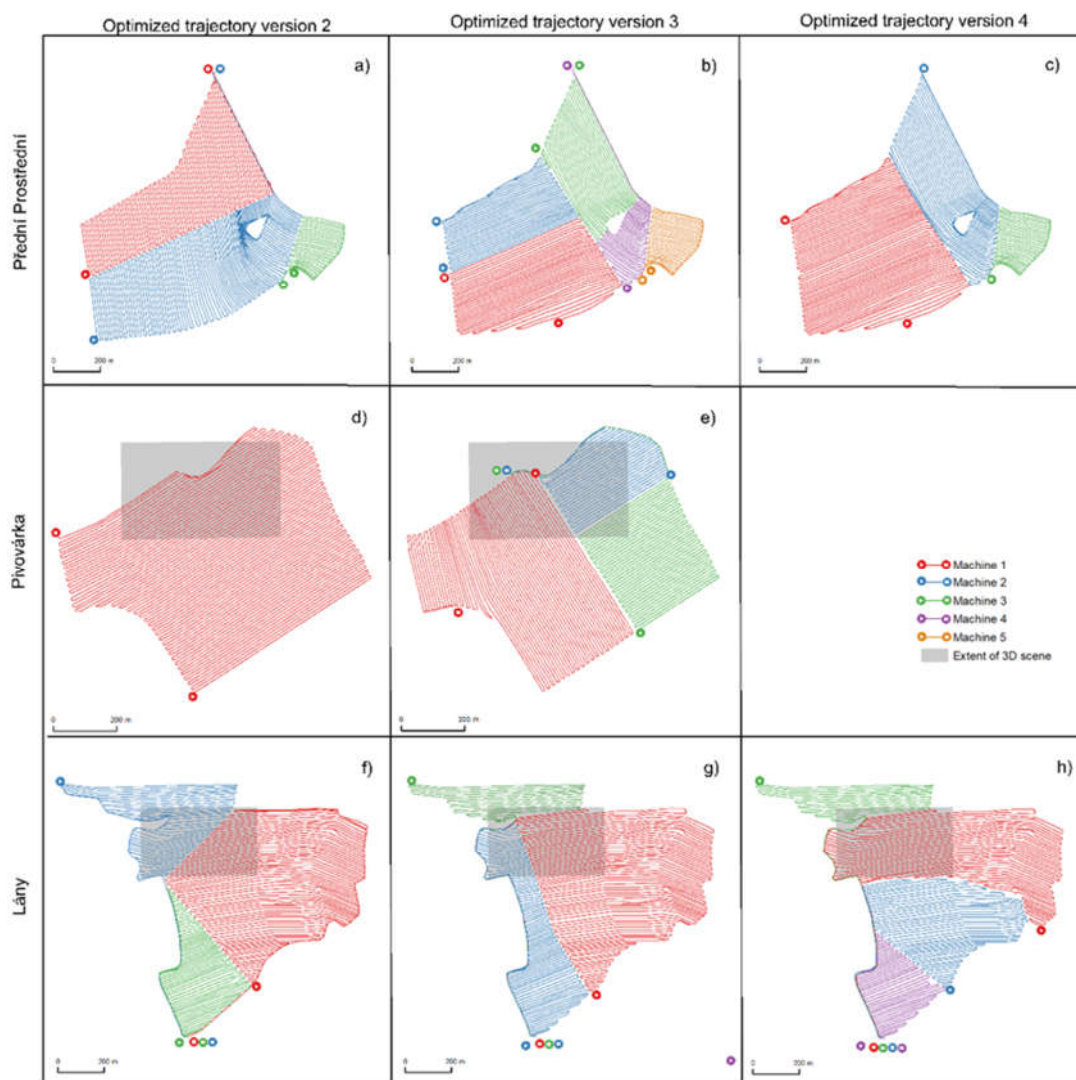

**Figure S7.** Map-based presentation of all options of optimized (modelled) trajectories according to the number of harvesting sequences.

#### 4. Complete statistics

**Table 1.** Descriptive statistics: a statistical comparison of all trajectories length, elevation gain, number of U-turns (head-lands). Note the table below is an extended version of Table 2 as presented in the paper.

| Plot              | Trajectory            | Length     |                | Turns  |                | Elevation |                |
|-------------------|-----------------------|------------|----------------|--------|----------------|-----------|----------------|
|                   |                       | Length [m] | Difference [%] | Number | Difference [%] | Gain      | Difference [%] |
| Pivovárka         | Real                  | 59762.16   | N/A            | 93     | N/A            | 2074.79   | N/A            |
|                   | Optimized-1 sequence  | 50623.76   | -15.29         | 121    | 30.11          | 1818.85   | -12.34         |
|                   | Optimized-2 sequences | 51011.80   | -14.64         | 136    | N/A            | 1784.11   | -14.01         |
| Lány              | Real                  | 87614.32   | N/A            | 151    | 11.03          | 1865.13   | N/A            |
|                   | Optimized-4 sequences | 72299.52   | -17.48         | 98     | N/A            | 1509.51   | -19.07         |
|                   | Option 1              |            |                |        |                |           |                |
|                   | Optimized-3 sequences | 70924.94   | -19.05         | 161    | 18.38          | 1499.34   | -19.61         |
|                   | Option 1              |            |                |        |                |           |                |
|                   | Optimized-3 sequences | 70770.85   | -19.22         | 177    | 80.61          | 1512.03   | -18.93         |
| Přední Prostřední | Option 2              |            |                |        |                |           |                |
|                   | Optimized-4 sequences | 69841.97   | -20.28         | 40.58  | N/A            | 1461.37   | -21.65         |
|                   | Option 2              |            |                |        |                |           |                |
|                   | Real                  | 73429.95   | N/A            | 98     | N/A            | 2862.37   | N/A            |
|                   | Optimized-4 sequences | 66050.45   | -10.05         | 177    | 80.61          | 1351.52   | -52.78         |
|                   | Option 1              |            |                |        |                |           |                |
| Přední Prostřední | Optimized-3 sequences | 62588.99   | -14.76         | 122    | 24.49          | 1342.00   | -53.12         |
|                   | Option 1              |            |                |        |                |           |                |
|                   | Optimized-5 sequences | 62390.99   | -15.03         | 150    | 53.06          | 1314.00   | -54.09         |
| Přední Prostřední | Option 2              |            |                |        |                |           |                |
|                   | Optimized-3 sequences | 65761.20   | -10.44         | 199    | 103.06         | 1534.16   | -46.40         |

**Table 2.** Descriptive statistics: a statistical comparison of differences between all trajectories length, elevation gain, number of U-turns (headlands) when taking into account entry/exit points.

| Plot              | Trajectory                     | Length     |                | Turns  |                | Elevation |                |
|-------------------|--------------------------------|------------|----------------|--------|----------------|-----------|----------------|
|                   |                                | Length [m] | Difference [%] | Number | Difference [%] | Gain      | Difference [%] |
| Pivovárka         | Real                           | N/A        | N/A            | N/A    | N/A            | N/A       | N/A            |
|                   | Optimized-1 sequence           | 0          | 0              | 0      | 0              | 0         | 0              |
|                   | Optimized-2 sequences          | 423.65     | 0.71           | 0      | 0              | 32.26     | 1.55           |
| Lány              | Real                           | N/A        | N/A            | N/A    | N/A            | N/A       | N/A            |
|                   | Optimized-4 sequences Option 1 | 6782.37    | 7.74           | 0      | 0              | 244.85    | 13.13          |
|                   | Optimized-3 sequences Option 1 | 6131.66    | 7              | 0      | 0              | 260.34    | 13.96          |
|                   | Optimized-3 sequences Option 2 | 5474.46    | 6.25           | 0      | 0              | 234.97    | 12.6           |
|                   | Optimized-4 sequences Option 2 | 5238.33    | 5.98           | 0      | 0              | 208.57    | 11.18          |
|                   | Real                           | N/A        | N/A            | N/A    | N/A            | N/A       | N/A            |
| Přední Prostřední | Optimized-4 sequences          | 3184.34    | 4.34           | 0      | 0              | 109.06    | 3.81           |
|                   | Optimized-3 sequences Option 1 | 2944.61    | 4.01           | 0      | 0              | 100.63    | 3.52           |
|                   | Optimized-5 sequences          | 2589.74    | 3.53           | 0      | 0              | 106.59    | 3.72           |
|                   | Optimized-3 sequences Option 2 | 1352.81    | 1.84           | 0      | 0              | 89.04     | 3.11           |
